# Supplementary material for: Near-infrared long persistent luminescence of Er3+ in garnet for the third bio-imaging window
Source: Royal Society of Chemistry journal article supplement (doi:10.1039/c6tc04027f), 2016-01-01
Supplement: c6tc04027f1.pdf [file c6tc04027f1.pdf]

## Supporting information

### Near-infrared long persistent luminescence of $\text{Er}^{3+}$ in garnet for the third bio-imaging window

Jian Xu\*, Daisuke Murata, Jumpei Ueda, and Setsuhisa Tanabe\*

Graduate School of Human and Environmental Studies, Kyoto University, Yoshida-nihonmatsu-cho  
Sakyo-ku, Kyoto 606-8501, Japan

\*Corresponding author. Tel: +81-75-753-6832.

E-mail: [xu.jian.57z@st.kyoto-u.ac.jp](mailto:xu.jian.57z@st.kyoto-u.ac.jp), [tanabe.setsuhisa.4v@kyoto-u.ac.jp](mailto:tanabe.setsuhisa.4v@kyoto-u.ac.jp)

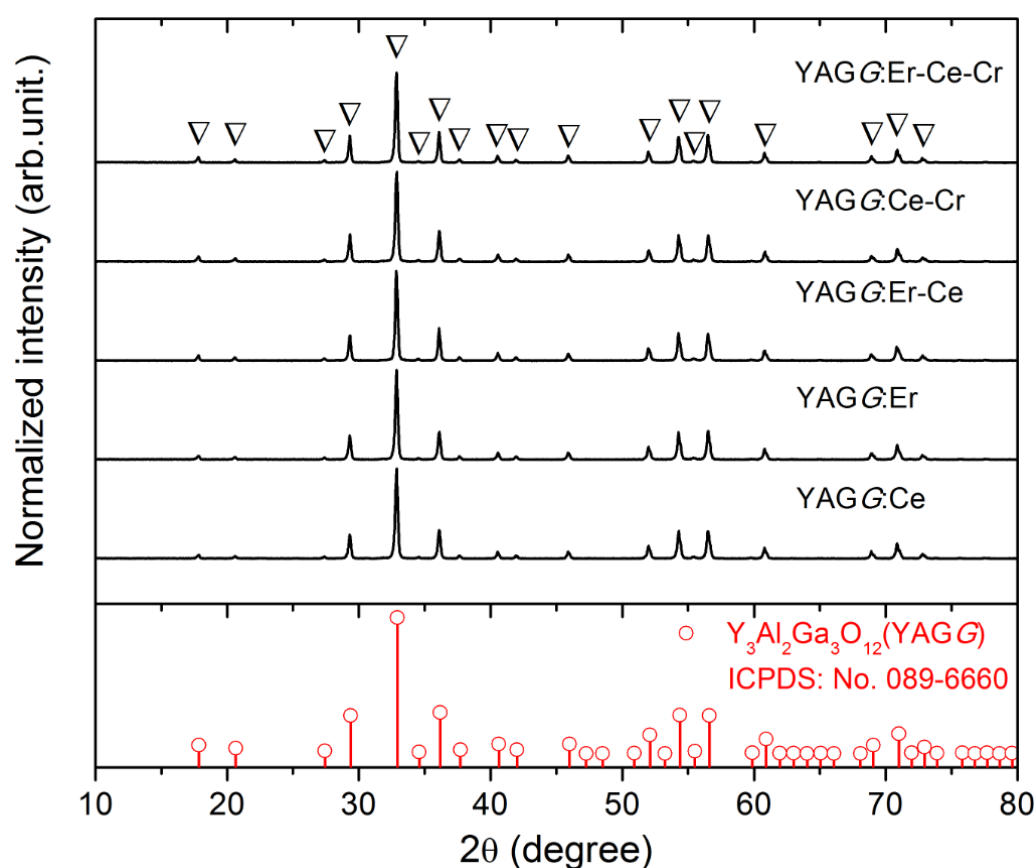

Fig. S1 X-ray diffraction (XRD) patterns of the YAGG:Ce, YAGG:Er, YAGG:Er-Ce, YAGG:Ce-Cr and YAGG:Er-Ce-Cr ceramic samples

The phase compositions of the YAGG:Ce, YAGG:Er, YAGG:Er-Ce, YAGG:Ce-Cr and YAGG:Er-Ce-Cr ceramic samples were measured by X-ray diffraction (XRD) measurements (Ultima IV, Rigaku), utilizing nickel filtered Cu K-alpha radiation (1.5406 Å). All of the as-prepared samples are confirmed to be single phase matching well with the standard card (ICPDS: No. 089-6660) of  $\text{Y}_3\text{Al}_2\text{Ga}_3\text{O}_{12}$  (YAGG).

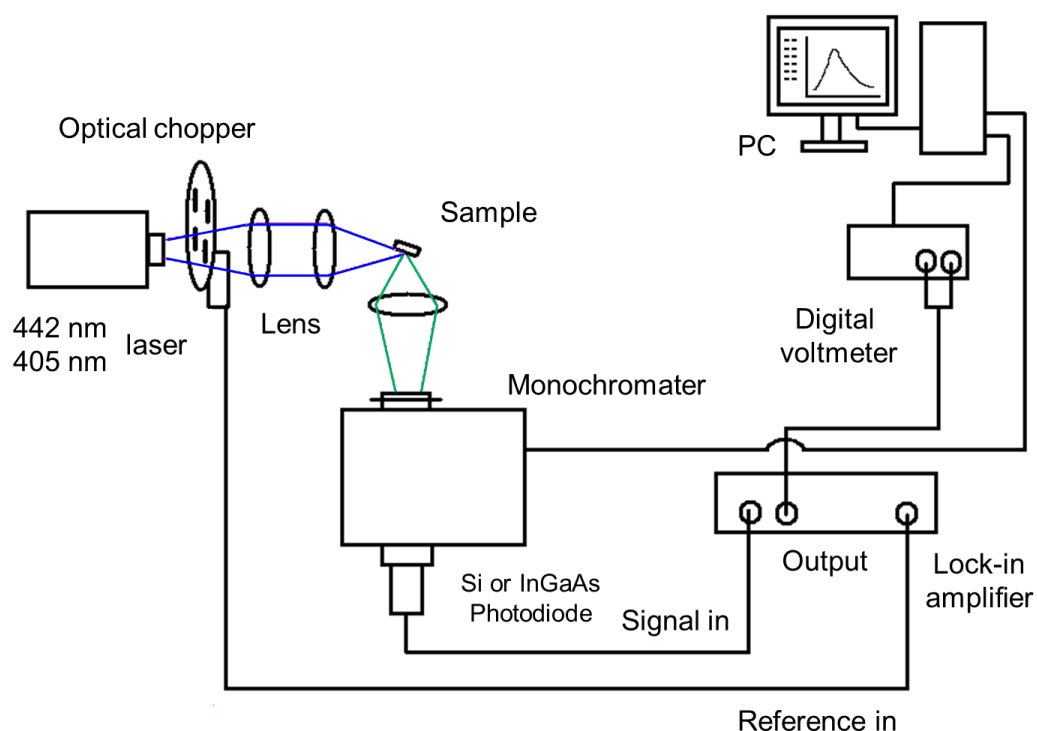

Fig. S2 The measurement setup of photoluminescence (PL)

Photoluminescence (PL) spectra of the YAGG:Ce, YAGG:Er and YAGG:Ce-Er ceramic samples by pumping with a 405 nm laser diode (LD) (SDL-405-LM-100T, Shanghai Dream Lasers Technology Co. Ltd.,) and the YAGG:Ce-Cr and YAGG:Er-Ce-Cr samples by pumping with a 442 nm LD (NDHB510APA-E, Nichia Co. Ltd.,) were recorded in the range of 350-1670 nm. The PL spectra were measured by a monochromator (G250, Nikon), a Si photodiode (PD) detector (S-025-H, Electro-Optical System Inc.,) from 350 to 1100 nm and an InGaAs PD detector (IGA-030-H, Electro-Optical System Inc.,) from 1100 to 1670 nm. All the PL spectra were calibrated by using a standard halogen lamp (SCL-600, Labsphere).

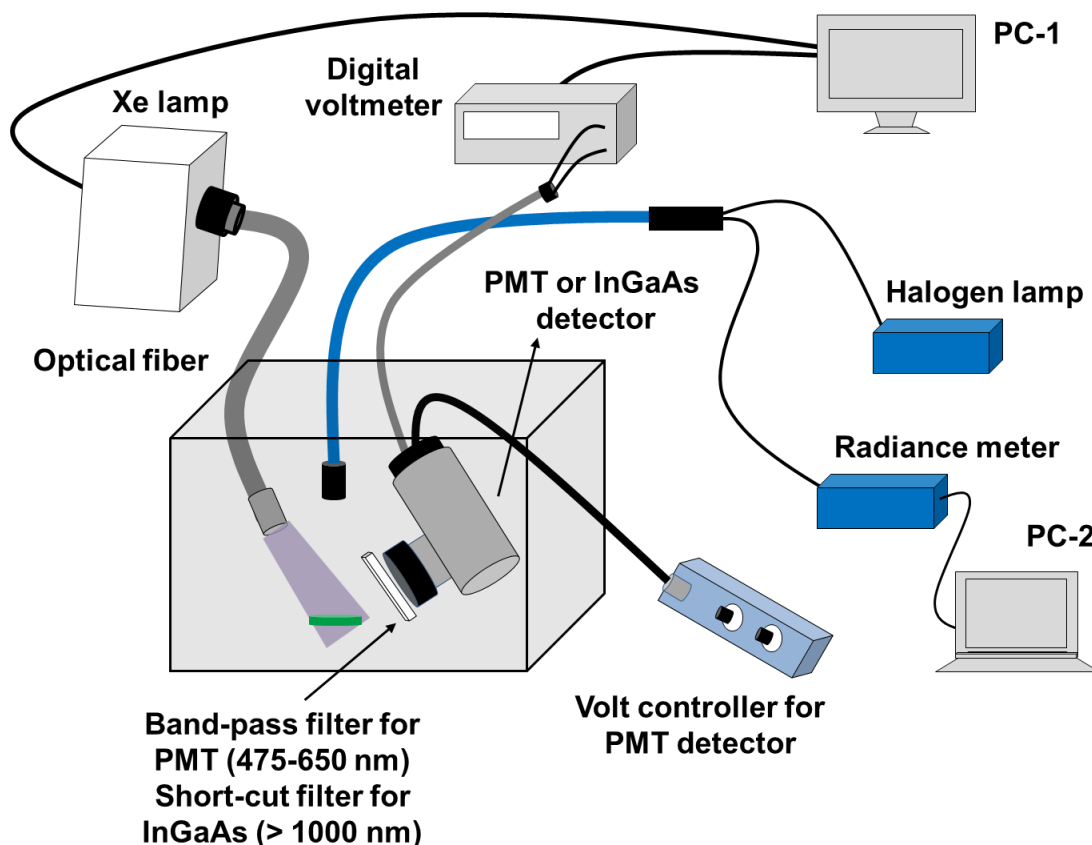

Fig. S3 The measurement setup of persistent luminescent decay curves

All persistent luminescent decay curves of the YAGG:Ce-Cr and YAGG:Er-Ce-Cr samples after being excited for 5 min by a 300 W Xe lamp (MAX-302, Asahi Spectra) with a 460 nm band-pass filter were measured at 25°C using a PMT detector (R11041, Hamamatsu Photonics & Co. Ltd.) or an InGaAs photodiode (PD) detector (IGA-030-H, Electro-Optical System Inc.). In order to monitor the  $\text{Ce}^{3+}$  emission, the PMT detector was covered with 475 nm short-cut and 650 nm long-cut filters to filter out all but the  $\text{Ce}^{3+}$  luminescence. Then the decay curves were calibrated to the absolute luminance (in unit of  $\text{mcd/m}^2$ ) using a radiance meter (Glacier X, B&W Tek Inc). In order to monitor the  $\text{Er}^{3+}$  luminescence, the InGaAs PD was covered with a 1000 nm short-cut filter to filter out all but the  $\text{Er}^{3+}$  luminescence. Then the decay curves were calibrated to the absolute radiance (in unit of  $\text{mW/Sr/m}^2$ ) using the same radiance meter.
